# Supplementary material for: Small local variations in B-form DNA lead to a large variety of global geometries which can accommodate most DNA-binding protein motifs
Source: PubMed Central journal article supplement (PMC2687451; doi:10.1186/1472-6807-9-24), 2009-04-24
Supplement: 1472-6807-9-24-S2.pdf [file 1472-6807-9-24-S2.pdf]

Variation of different local and global parameters  
for the four datasets

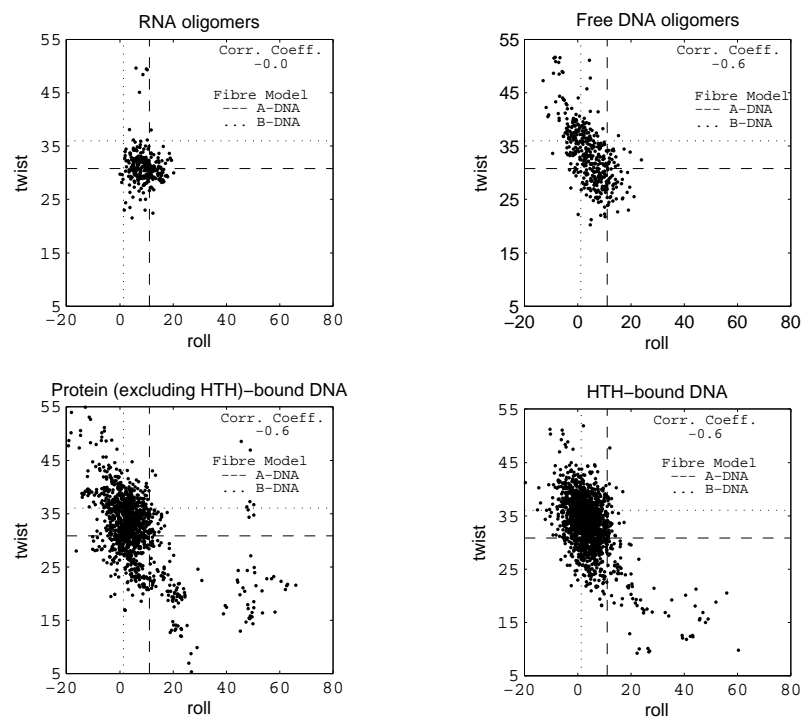

Figure 1: Twist versus Roll for the RNA, free DNA oligomers, protein (excluding HTH)-bound DNA and HTH-bound DNA datasets. Dashed and dotted lines have been drawn to highlight the values for the A and B-DNA fibre models.

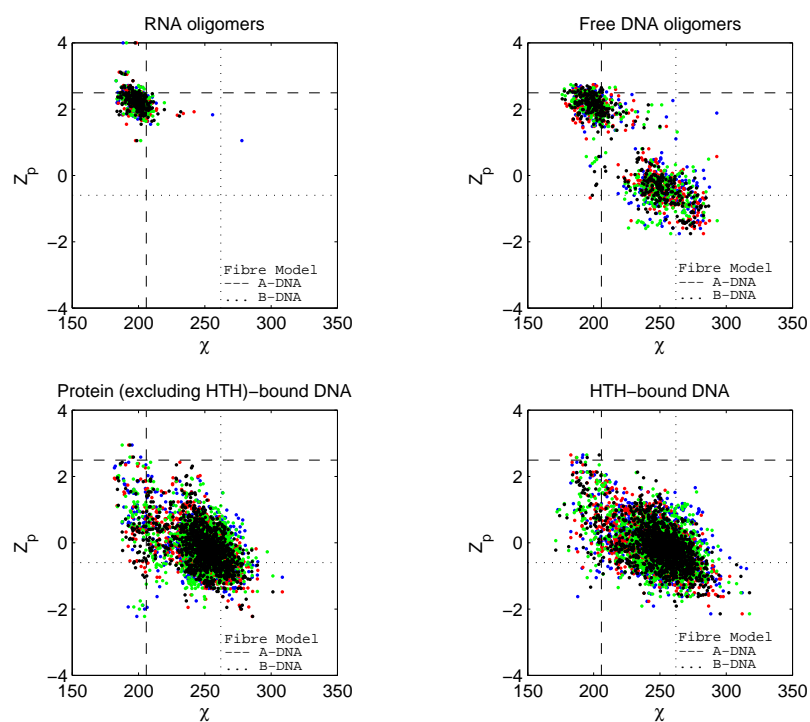

Figure 2:  $Z_p$  versus backbone torsion angle  $\chi$  for the four datasets. The four nucleotides constituting a basepaired dinucleotide step corresponding to a particular  $Z_p$  value have been colour coded as follows: 5'-end Strand 1 - blue; 3'-end Strand 1 - Red; 5'-end Strand 2 - Green; 3'-end Strand 2 - Black.

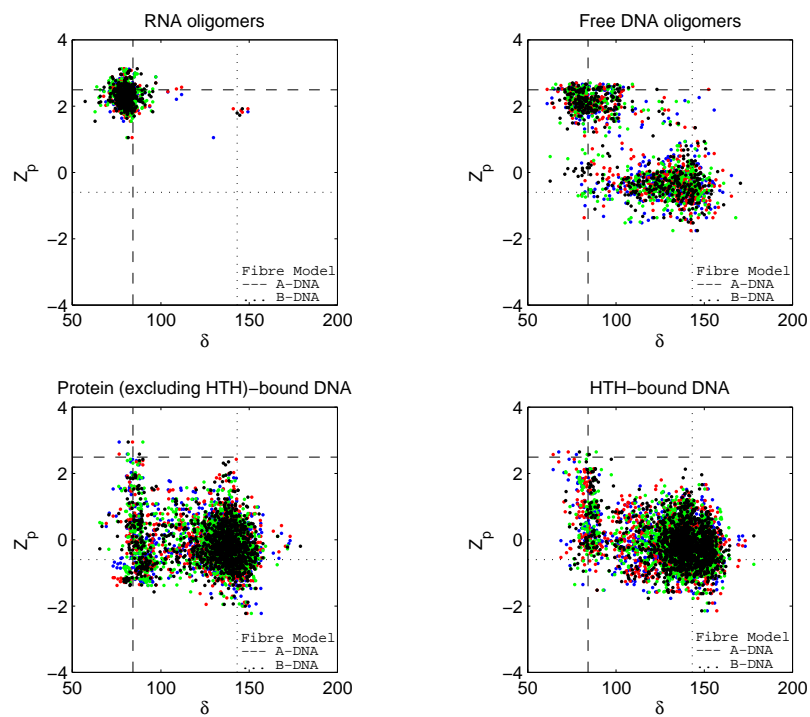

Figure 3:  $Z_p$  versus backbone torsion angle  $\delta$  for the four datasets. The four nucleotides constituting a basepaired dinucleotide step corresponding to a particular  $Z_p$  value have been colour coded as follows: 5'-end Strand 1 - blue; 3'-end Strand 1 - Red; 5'-end Strand 2 - Green; 3'-end Strand 2 - Black.

Table 1: Mean and standard deviation values (in parentheses) for global helical basepair orientation parameters and groove widths. The linear global helical axis has been fitted to the backbone  $C_1'$  atoms. For the complex and HTH datasets, structures which are curved or whose geometry of curvature could not be assigned are excluded, since a linear global helical axis cannot be fitted to such structures.

|                                                                 | Fibre-model |       | RNA           | Free                                  |                                          | Complex<br>Excl. TEH <sup>†</sup> | HTH<br>Excl. TC <sup>‡</sup> |
|-----------------------------------------------------------------|-------------|-------|---------------|---------------------------------------|------------------------------------------|-----------------------------------|------------------------------|
|                                                                 | A-DNA       | B-DNA |               | A-like<br>( $Z_p > 1.3 \text{ \AA}$ ) | B-like<br>( $Z_p \leq 0.8 \text{ \AA}$ ) |                                   |                              |
| Inclination ( $^\circ$ )                                        | 19.3        | 2.0   | 15.4<br>(4.8) | 16.5<br>(5.1)                         | 2.0<br>(3.5)                             | 6.4<br>(6.2)                      | 5.9<br>(6.5)                 |
| Helical twist ( $^\circ$ )                                      | 32.7        | 36.0  | 32.7<br>(6.1) | 32.1<br>(3.7)                         | 35.9<br>(6.0)                            | 34.1<br>(4.6)                     | 34.0<br>(4.8)                |
| X-displacement ( $\text{\AA}$ )                                 | -4.5        | 0.6   | -4.3<br>(1.2) | -4.3<br>(0.9)                         | 0.1<br>(0.8)                             | -1.1<br>(1.1)                     | -0.9<br>(1.3)                |
| Helical rise ( $\text{\AA}$ )                                   | 2.6         | 3.4   | 2.7<br>(0.3)  | 2.7<br>(0.3)                          | 3.3<br>(0.1)                             | 3.2<br>(0.1)                      | 3.2<br>(0.2)                 |
| Smallest P-P distance ( $\text{\AA}$ )<br>(across minor groove) | 17.0        | 11.7  | 15.7<br>(0.6) | 15.8<br>(0.6)                         | 11.1<br>(1.5)                            | 12.4<br>(1.7)                     | 12.5<br>(1.8)                |
| Smallest P-P distance ( $\text{\AA}$ )<br>(across major groove) | 8.2         | 17.2  | 11.1<br>(2.0) | 11.6<br>(2.7)                         | 17.1<br>(0.9)                            | 17.3<br>(1.7)                     | 17.1<br>(1.3)                |

<sup>†</sup>TEH - TBP, Endonuclease and Hyperthermophile chromosomal protein SAC7D containing structures (excluded)

<sup>‡</sup>TC - TBP and CAP containing structures (excluded)
